# Supplementary material for: Mesosphaerum suaveolens Essential Oil Attenuates Inflammatory Response and Oxidative Stress in LPS-Stimulated RAW 264.7 Macrophages by Regulating NF-κB Signaling Pathway
Source: MDPI journal article supplement (doi:10.3390/molecules28155817), 2023-08-02
Supplement: s1 [file s1]

## **-Supplementary Materials-**

### ***Mesosphaerum suaveolens* essential oil attenuates inflammatory response and oxidative stress in LPS-stimulated RAW 264.7 macrophages by regulating NF- $\kappa$ B signaling pathway**

**Omprakash Mohanta, Asit Ray, Sudipta Jena, Ambika Sahoo, Soumya Swarup Panda, Prabhat Kumar Das, Sanghamitra Nayak and Pratap Chandra Panda\***

Centre for Biotechnology, Siksha 'O' Anusandhan (Deemed to be University),  
Kalinga Nagar, Bhubaneswar-751003, India

\* Correspondence: author Email: [pcpanda2001@yahoo.co.in](mailto:pcpanda2001@yahoo.co.in)

#### **Contents:**

**Figure S1.** GC-MS chromatogram of the *Mesosphaerum suaveolens* leaf essential oil (MSLEO).

**Figure S2.** Image of *Mesosphaerum suaveolens* plant

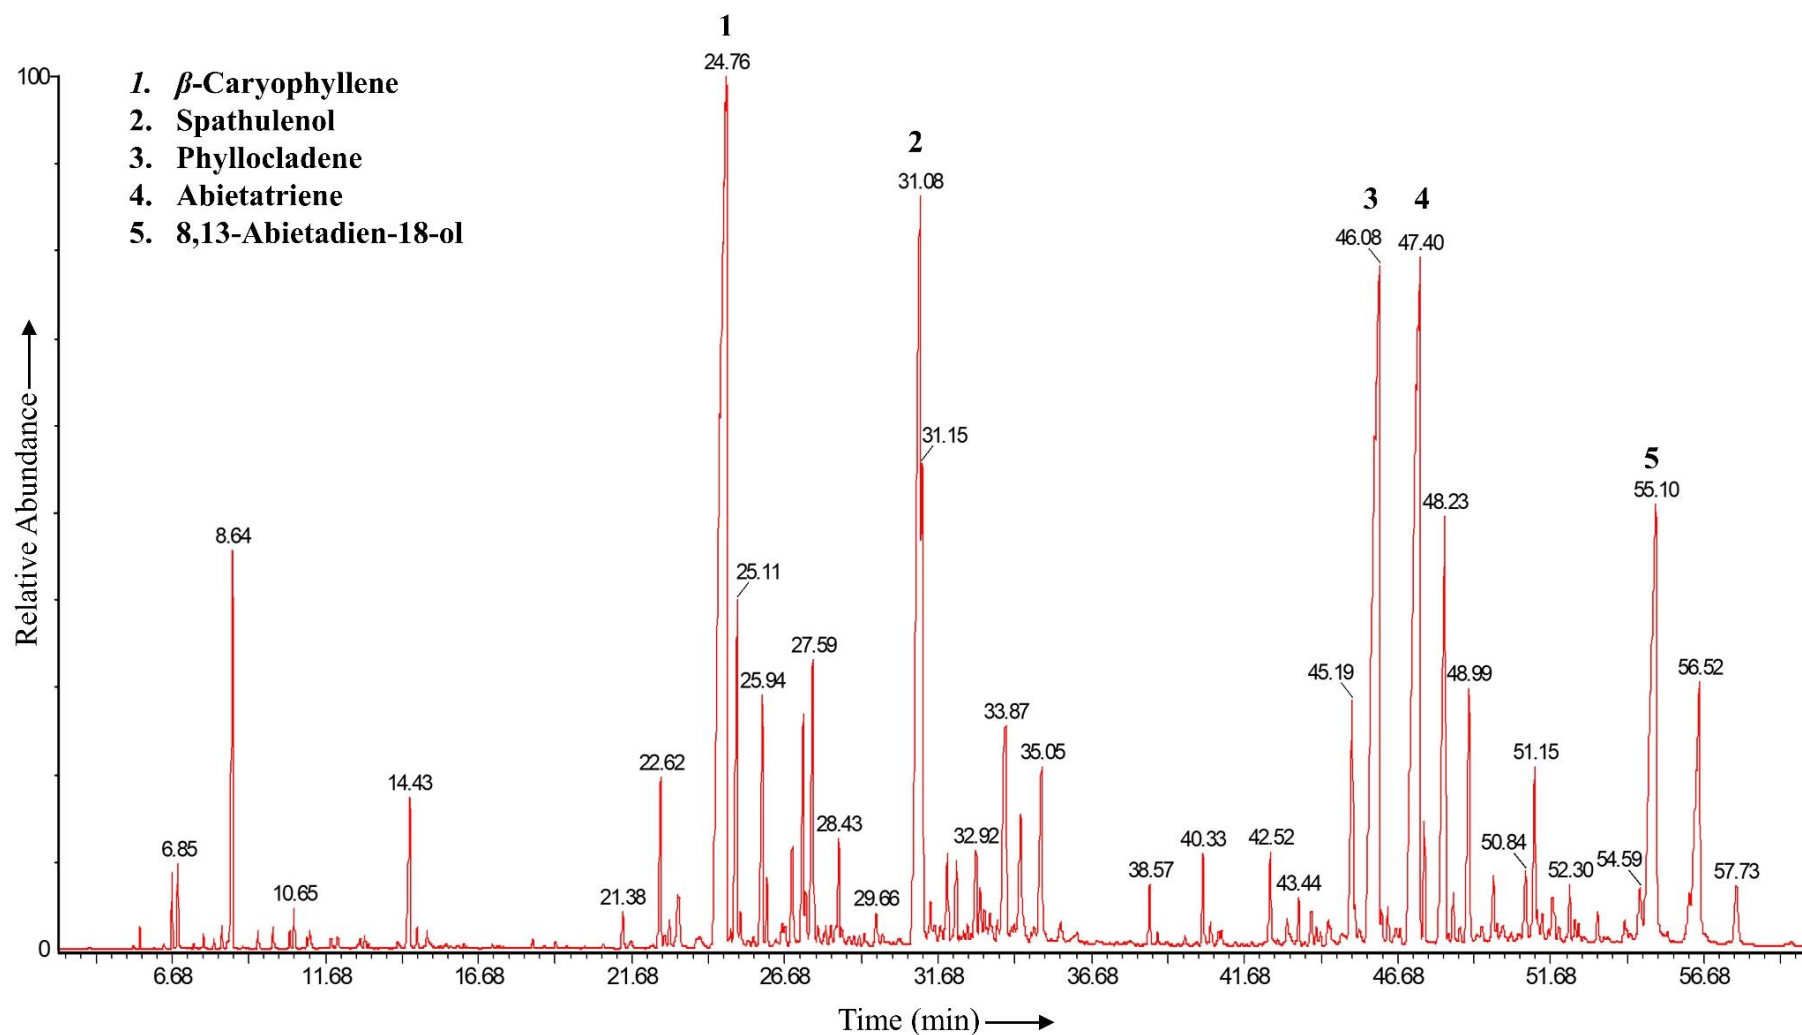

**Figure S1.** A representative GC-MS chromatogram of *Mesosphaerum suaveolens* leaf essential oil (MSLEO). Peaks corresponds to the five most dominant constituents, labeled as 1 to 5.

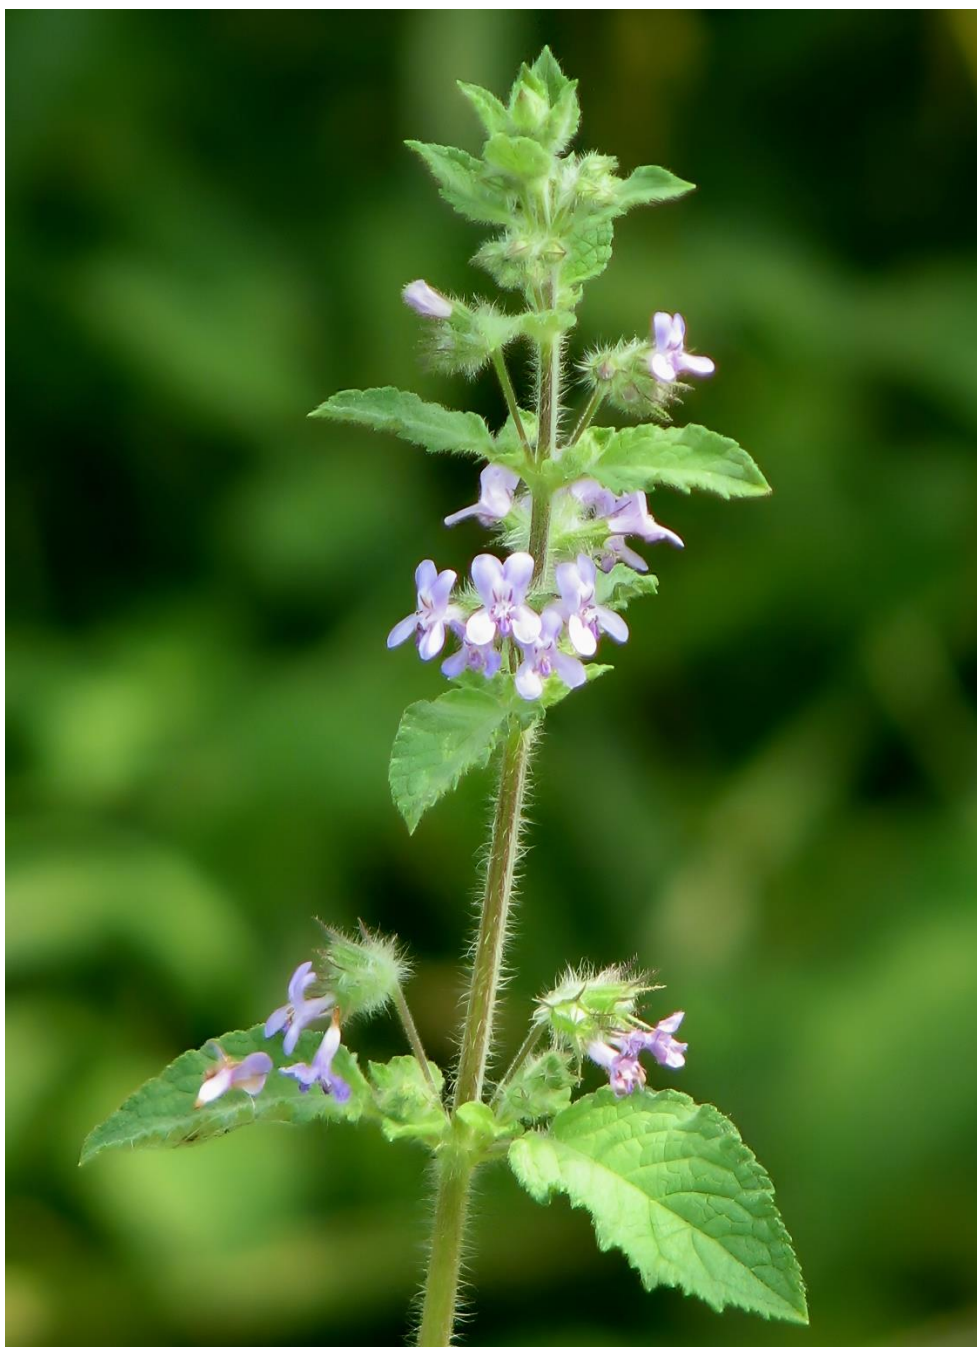

**Figure S2.** *Mesosphaerum suaveolens* plant
